# Supplementary material
Source: Springer Nature journal article supplement (https://www.springermedizin.de/resource/supplementary/13024_2013_507_MOESM5_ESM.pdf/9644096)

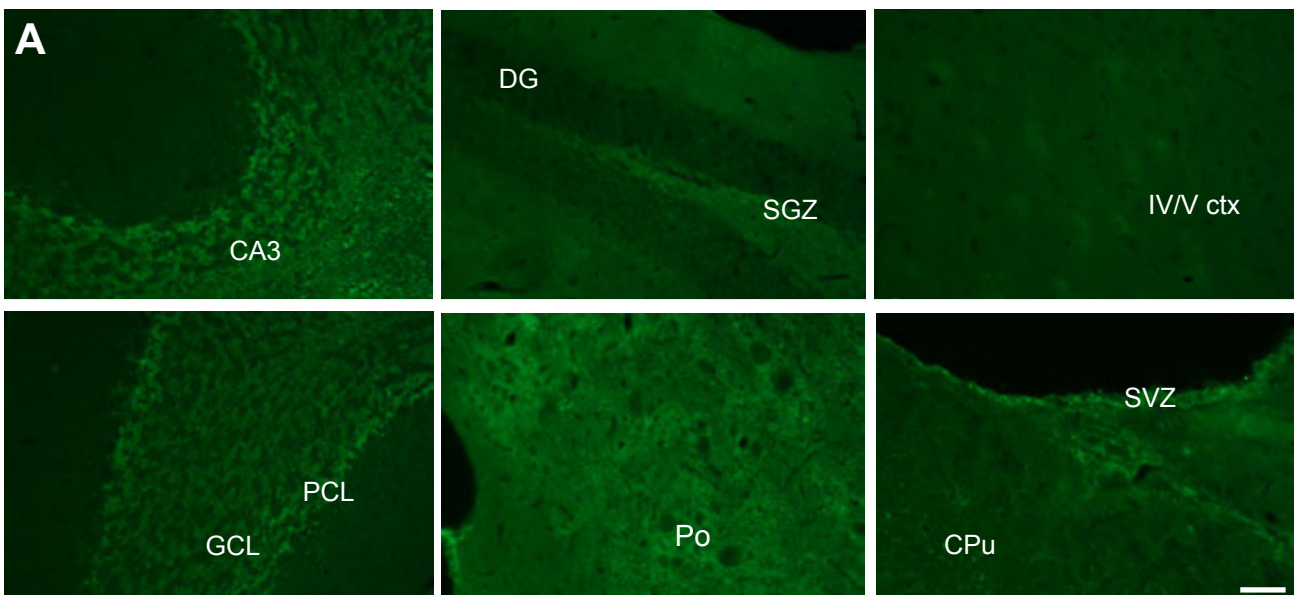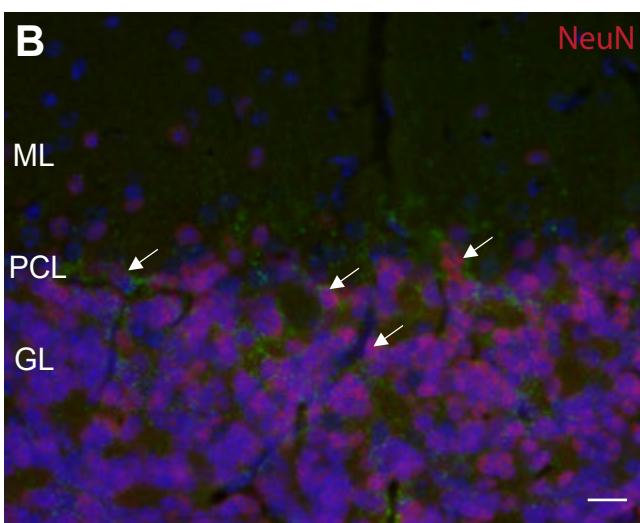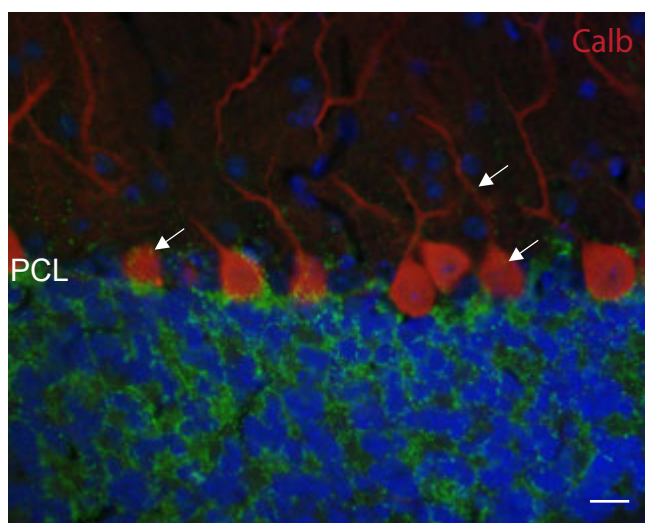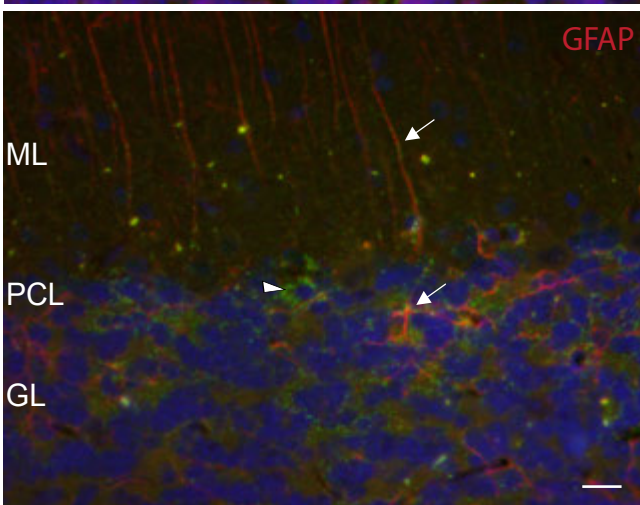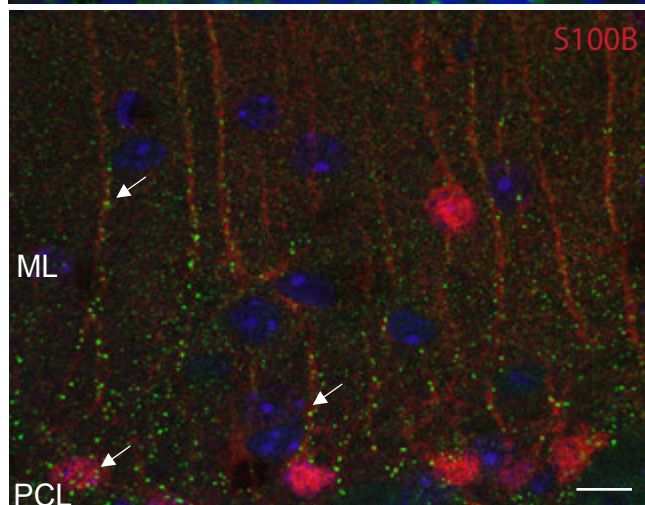

Supplement: MOESM5 [file 9644096]
